# Supplementary material for: Molecular basis for the regulation of human glycogen synthase by phosphorylation and glucose-6-phosphate
Source: PubMed Central journal article supplement (PMC9287172; doi:10.1038/s41594-022-00799-3), 2022-07-14

**Supplementary information**

---

**Molecular basis for the regulation of human glycogen synthase by phosphorylation and glucose-6-phosphate**

---

In the format provided by the authors and unedited

# Molecular basis for the regulation of human glycogen synthase by phosphorylation and glucose-6-phosphate

Thomas J. McCorvie<sup>1,6</sup>, Paula M. Loria<sup>2</sup>, Meihua Tu<sup>3</sup>, Seungil Han<sup>4</sup>, Leela Shrestha<sup>1</sup>, D. Sean Froese<sup>1,5</sup>, Igor M. Ferreira<sup>1</sup>, Allison P. Berg<sup>2</sup>✉, Wyatt W. Yue<sup>1,6</sup>✉

<sup>1</sup>Centre for Medicines Discovery, Nuffield Department of Clinical Medicine, University of Oxford, Oxford OX3 7DQ, UK

<sup>2</sup>Rare Disease Research Unit, Worldwide Research and Development, Pfizer Inc., 610 Main Street, Cambridge, MA 02139, USA

<sup>3</sup>Pfizer Inc. Medicine Design, Cambridge, Massachusetts 02139, USA

<sup>4</sup>Discovery Sciences, Worldwide Research and Development, Pfizer Inc., Eastern Point Road, Groton, CT 06340, USA

<sup>5</sup>Present address: Division of Metabolism and Children's Research Center, University Children's Hospital Zürich, University of Zürich, Switzerland

<sup>6</sup>Present address: Biosciences Institute, The Medical School, Newcastle University, Newcastle upon Tyne, NE2 4HH, UK

✉e-mail: allison.berg@pfizer.com; wyatt.yue@cmd.ox.ac.uk

## Supplementary Figures

**Supplementary Fig. 1:** Sequence alignment of GYS proteins.

**Supplementary Fig. 2:** Sequence alignment of the N-terminus and CBM21 domain of each PP1 regulatory subunit and the starch binding domain of *R. oryzae* glucoamylase.

**Supplementary Fig. 3:** PTG pulldowns and BN-PAGE replicates.

**Supplementary Fig. 4:** Representative thermal shift unfolding curves of each GYS1:GYG1 complex and PTG(CBM21) mutant.

**Supplementary Table 1:** Sequences of oligonucleotides used for mutagenesis.

**Uncropped image of Supplementary Fig. 3a**

**Uncropped image of Supplementary Fig. 3b**

**Uncropped image of Supplementary Fig. 3c**



sp|P13807|GYS1\_HUMAN →β8 α10 →β9 α11 →α12

260 270 280 290 300 310

```

sp|P13807|GYS1_HUMAN HVFTTVSITAIEAHLLKRRKPDIVNPNGLNVKKEFSANHEFQNLHAQSKARIQEFVRGHF
sp|P54840|GYS2_HUMAN HVFTTVSITAIEAHMLKRRKPDVVTPNGLNVKKEFSAVHEFQNLHAMYKARIQDFVRGHF
sp|P23337|GYS1_YEAST DVFTTVSITALEAEHLKRRKPDGIIPNGLNVKKEFAVHEFQNLHAKKDKINDFVRGHF
sp|P27472|GYS2_YEAST DVFTTVSITAFEAHLLKRRKPDGIIPNGLNVKKEFAVHEFQNLHAKKDKINDFVRGHF
sp|Q902D9|GYS_CAEL HFTFTVSITGLEAEHLKRRKPDVLTNGLNVKKEFAVHEFQNLHAKKDKINDFVRGHF
sp|Q9VFC8|GYS_DROME HVFTTVSITGIEAEHLKRRKPDITNGLNVKKEFSVHEFQNLHAKKDKINDFVRGHF
sp|Q921E4|GYS1_MOUSE HVFTTVSITAIEAHLLKRRKPDIVTPNGLNVKKEFSANHEFQNLHAQSKARIQEFVRGHF
sp|Q8VCB3|GYS2_MOUSE HVFTTVSITAIEAHMLKRRKPDVVTPNGLNVKKEFSVHEFQNLHAMYKARIQDFVRGHF
sp|A2RRU1|GYS1_RAT HVFTTVSITAIEAHLLKRRKPDIVTPNGLNVKKEFSVHEFQNLHAMYKARIQDFVRGHF
sp|P17625|GYS2_RAT HVFTTVSITAIEAHMLKRRKPDVVTPNGLNVKKEFSVHEFQNLHAMYKARIQDFVRGHF
sp|P13834|GYS1_RABIT HVFTTVSITAIEAHLLKRRKPDIVTPNGLNVKKEFSANHEFQNLHAQSKARIQEFVRGHF
sp|A7MB78|GYS1_BOVIN HVFTTVSITAIEAHLLKRRKPDIVTPNGLNVKKEFSANHEFQNLHAQSKARIQEFVRGHF

```

sp|P13807|GYS1\_HUMAN →β10 α13 →β11

320 330 340 350 360

```

sp|P13807|GYS1_HUMAN YCHLDFNDKLYFFIAGRYEFSNKGADVFLSALRLNYLDRVNG...SEQTVVAFITM
sp|P54840|GYS2_HUMAN YCHLDFDDEKLYFFIAGRYEFSNKGADVFLSALRLNYLDRVNG...SDITVMVVFITM
sp|P23337|GYS1_YEAST YCHLDFDDEKLYFFIAGRYEFSNKGADVFLSALRLNYLDRVNG...SDITVMVVFITM
sp|P27472|GYS2_YEAST YCHLDFDDEKLYFFIAGRYEFSNKGADVFLSALRLNYLDRVNG...SDITVMVVFITM
sp|Q902D9|GYS_CAEL YCHLDFDDEKLYFFIAGRYEFSNKGADVFLSALRLNYLDRVNG...SDITVMVVFITM
sp|Q9VFC8|GYS_DROME YCHLDFDDEKLYFFIAGRYEFSNKGADVFLSALRLNYLDRVNG...SDITVMVVFITM
sp|Q921E4|GYS1_MOUSE YCHLDFDDEKLYFFIAGRYEFSNKGADVFLSALRLNYLDRVNG...SDITVMVVFITM
sp|Q8VCB3|GYS2_MOUSE YCHLDFDDEKLYFFIAGRYEFSNKGADVFLSALRLNYLDRVNG...SDITVMVVFITM
sp|A2RRU1|GYS1_RAT YCHLDFDDEKLYFFIAGRYEFSNKGADVFLSALRLNYLDRVNG...SDITVMVVFITM
sp|P17625|GYS2_RAT YCHLDFDDEKLYFFIAGRYEFSNKGADVFLSALRLNYLDRVNG...SDITVMVVFITM
sp|P13834|GYS1_RABIT YCHLDFDDEKLYFFIAGRYEFSNKGADVFLSALRLNYLDRVNG...SDITVMVVFITM
sp|A7MB78|GYS1_BOVIN YCHLDFDDEKLYFFIAGRYEFSNKGADVFLSALRLNYLDRVNG...SDITVMVVFITM

```

sp|P13807|GYS1\_HUMAN →β12 α14 →TT

370 380 390 400 410 420

```

sp|P13807|GYS1_HUMAN PARTNPNVETLKGQAVRKQLWDTANTVKEKFGKRLYESSLVG...SIPDMNKMIL
sp|P54840|GYS2_HUMAN PAKTNSFVETLKGQAVRKQLWDTANTVKEKFGKRLYESSLVG...SIPDMNKMIL
sp|P23337|GYS1_YEAST PAKTNSFVETLKGQAVRKQLWDTANTVKEKFGKRLYESSLVG...SIPDMNKMIL
sp|P27472|GYS2_YEAST PAKTNSFVETLKGQAVRKQLWDTANTVKEKFGKRLYESSLVG...SIPDMNKMIL
sp|Q902D9|GYS_CAEL PAKTNSFVETLKGQAVRKQLWDTANTVKEKFGKRLYESSLVG...SIPDMNKMIL
sp|Q9VFC8|GYS_DROME PAKTNSFVETLKGQAVRKQLWDTANTVKEKFGKRLYESSLVG...SIPDMNKMIL
sp|Q921E4|GYS1_MOUSE PAKTNSFVETLKGQAVRKQLWDTANTVKEKFGKRLYESSLVG...SIPDMNKMIL
sp|Q8VCB3|GYS2_MOUSE PAKTNSFVETLKGQAVRKQLWDTANTVKEKFGKRLYESSLVG...SIPDMNKMIL
sp|A2RRU1|GYS1_RAT PAKTNSFVETLKGQAVRKQLWDTANTVKEKFGKRLYESSLVG...SIPDMNKMIL
sp|P17625|GYS2_RAT PAKTNSFVETLKGQAVRKQLWDTANTVKEKFGKRLYESSLVG...SIPDMNKMIL
sp|P13834|GYS1_RABIT PAKTNSFVETLKGQAVRKQLWDTANTVKEKFGKRLYESSLVG...SIPDMNKMIL
sp|A7MB78|GYS1_BOVIN PAKTNSFVETLKGQAVRKQLWDTANTVKEKFGKRLYESSLVG...SIPDMNKMIL

```

sp|P13807|GYS1\_HUMAN α15 →β13 α16 →β14

430 440 450 460 470

```

sp|P13807|GYS1_HUMAN DKEDFTMKRAIFATQR...CSPPVCTHNMIDDSDPILSTIRRIGLFNSSSDRVKVIFH
sp|P54840|GYS2_HUMAN DRDDLTIKRAIFSTQR...CSPPVCTHNMIDDSDPILSTIRRIGLFNSSSDRVKVIFH
sp|P23337|GYS1_YEAST KSSDKVLLKRRVILALRRPEGQLPPIVTHNMVDDANDLILNIRVOLFNSSSDRVKVIFH
sp|P27472|GYS2_YEAST KSSDKVLLKRRVILALRRPEGQLPPIVTHNMVDDANDLILNIRVOLFNSSSDRVKVIFH
sp|Q902D9|GYS_CAEL SPADNILLKRRIMGLHN...SSDPPVCTHNMIR...ADPVLSSLRRIGLFNSSSDRVKVIFH
sp|Q9VFC8|GYS_DROME CKDDLVLKRRCMFAMQR...DSMPPVCTHNVADDNDPVLSSIRRCGLFNSSSDRVKVIFH
sp|Q921E4|GYS1_MOUSE DKEDFTMKRAIFATQR...CSPPVCTHNMIDDSDPILSTIRRIGLFNSSSDRVKVIFH
sp|Q8VCB3|GYS2_MOUSE DRDDLTIKRAIFSTQR...CSPPVCTHNMIDDSDPILSTIRRIGLFNSSSDRVKVIFH
sp|A2RRU1|GYS1_RAT DKEDFTMKRAIFATQR...CSPPVCTHNMIDDSDPILSTIRRIGLFNSSSDRVKVIFH
sp|P17625|GYS2_RAT DRDDLTIKRAIFSTQR...CSPPVCTHNMIDDSDPILSTIRRIGLFNSSSDRVKVIFH
sp|P13834|GYS1_RABIT DKEDFTMKRAIFATQR...CSPPVCTHNMIDDSDPILSTIRRIGLFNSSSDRVKVIFH
sp|A7MB78|GYS1_BOVIN DKEDFTMKRAIFATQR...CSPPVCTHNMIDDSDPILSTIRRIGLFNSSSDRVKVIFH

```

sp|P13807|GYS1\_HUMAN α17 →β15 α18 →β16 α19

480 490 500 510 520 530

```

sp|P13807|GYS1_HUMAN PEFLLSSTSPLLPVDYEEFVRGCHLGVPFSYIEPWGYTPAECTVMGIPSVITNLSGFGCFM
sp|P54840|GYS2_HUMAN PEFLLSSTSPLLPVDYEEFVRGCHLGVPFSYIEPWGYTPAECTVMGIPSVITNLSGFGCFM
sp|P23337|GYS1_YEAST PEFLLSSTSPLLPVDYEEFVRGCHLGVPFSYIEPWGYTPAECTVMGIPSVITNLSGFGCFM
sp|P27472|GYS2_YEAST PEFLLSSTSPLLPVDYEEFVRGCHLGVPFSYIEPWGYTPAECTVMGIPSVITNLSGFGCFM
sp|Q902D9|GYS_CAEL PEFLLSSTSPLLPVDYEEFVRGCHLGVPFSYIEPWGYTPAECTVMGIPSVITNLSGFGCFM
sp|Q9VFC8|GYS_DROME PEFLLSSTSPLLPVDYEEFVRGCHLGVPFSYIEPWGYTPAECTVMGIPSVITNLSGFGCFM
sp|Q921E4|GYS1_MOUSE PEFLLSSTSPLLPVDYEEFVRGCHLGVPFSYIEPWGYTPAECTVMGIPSVITNLSGFGCFM
sp|Q8VCB3|GYS2_MOUSE PEFLLSSTSPLLPVDYEEFVRGCHLGVPFSYIEPWGYTPAECTVMGIPSVITNLSGFGCFM
sp|A2RRU1|GYS1_RAT PEFLLSSTSPLLPVDYEEFVRGCHLGVPFSYIEPWGYTPAECTVMGIPSVITNLSGFGCFM
sp|P17625|GYS2_RAT PEFLLSSTSPLLPVDYEEFVRGCHLGVPFSYIEPWGYTPAECTVMGIPSVITNLSGFGCFM
sp|P13834|GYS1_RABIT PEFLLSSTSPLLPVDYEEFVRGCHLGVPFSYIEPWGYTPAECTVMGIPSVITNLSGFGCFM
sp|A7MB78|GYS1_BOVIN PEFLLSSTSPLLPVDYEEFVRGCHLGVPFSYIEPWGYTPAECTVMGIPSVITNLSGFGCFM

```



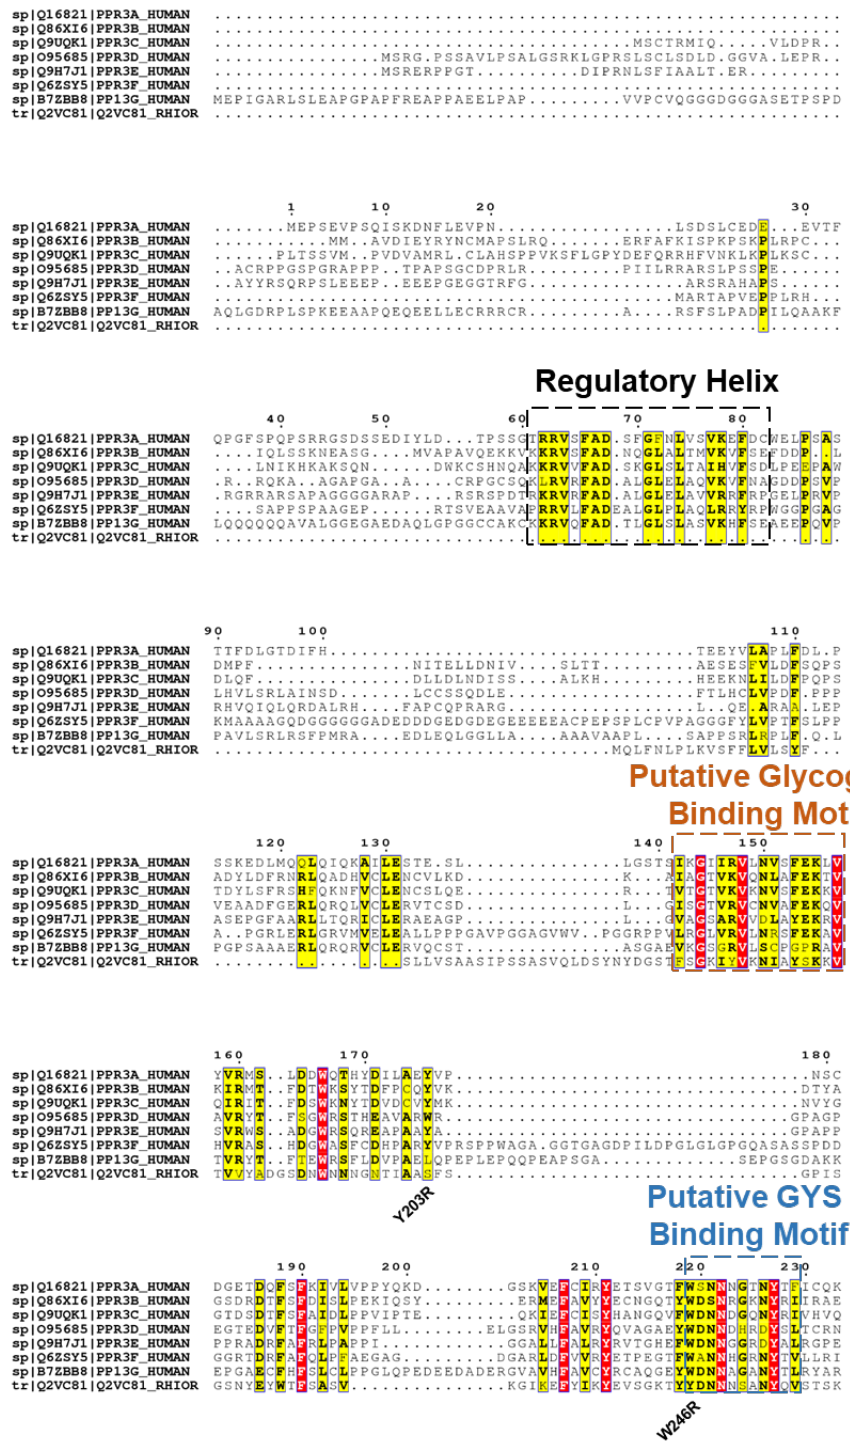

Supplementary Fig. 2 | Sequence alignment of the CBM21 domain of PP1 regulatory subunit PPP1R3 family and *R. oryzae* glucoamylase. Only the N-terminus and CBM21 domain of each PP1 regulatory subunit and *R. oryzae* glucoamylase are shown. Key motifs are highlighted.

**a**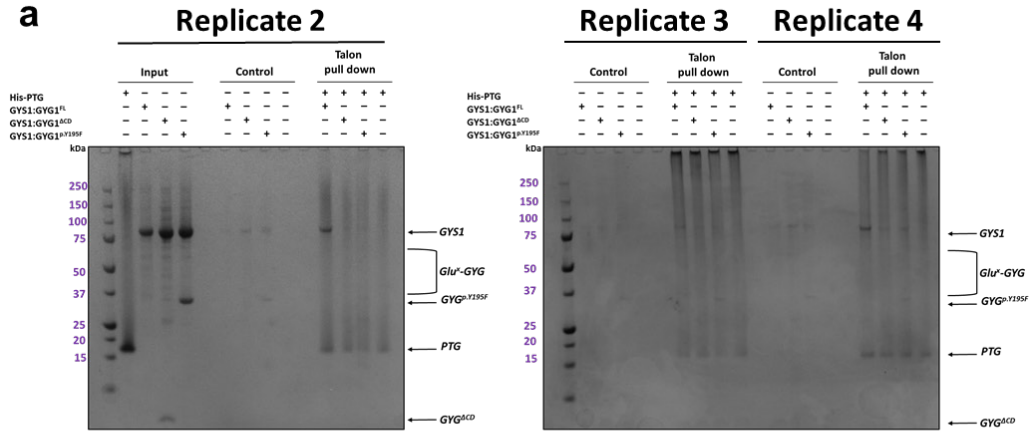**b**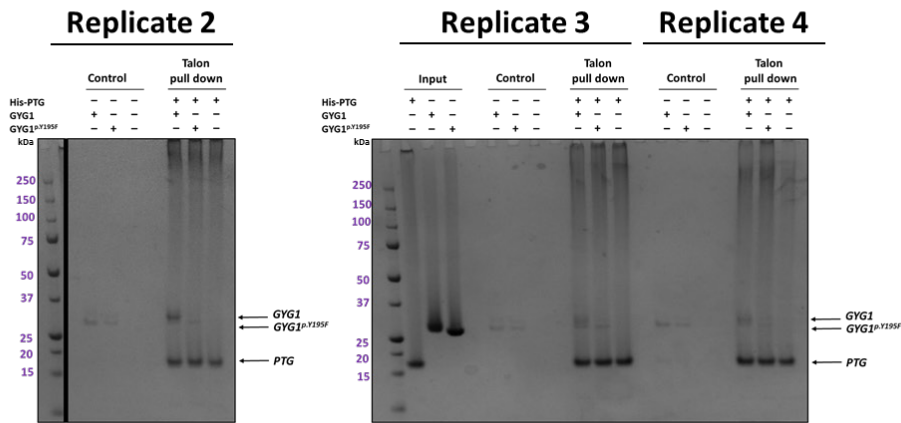**c**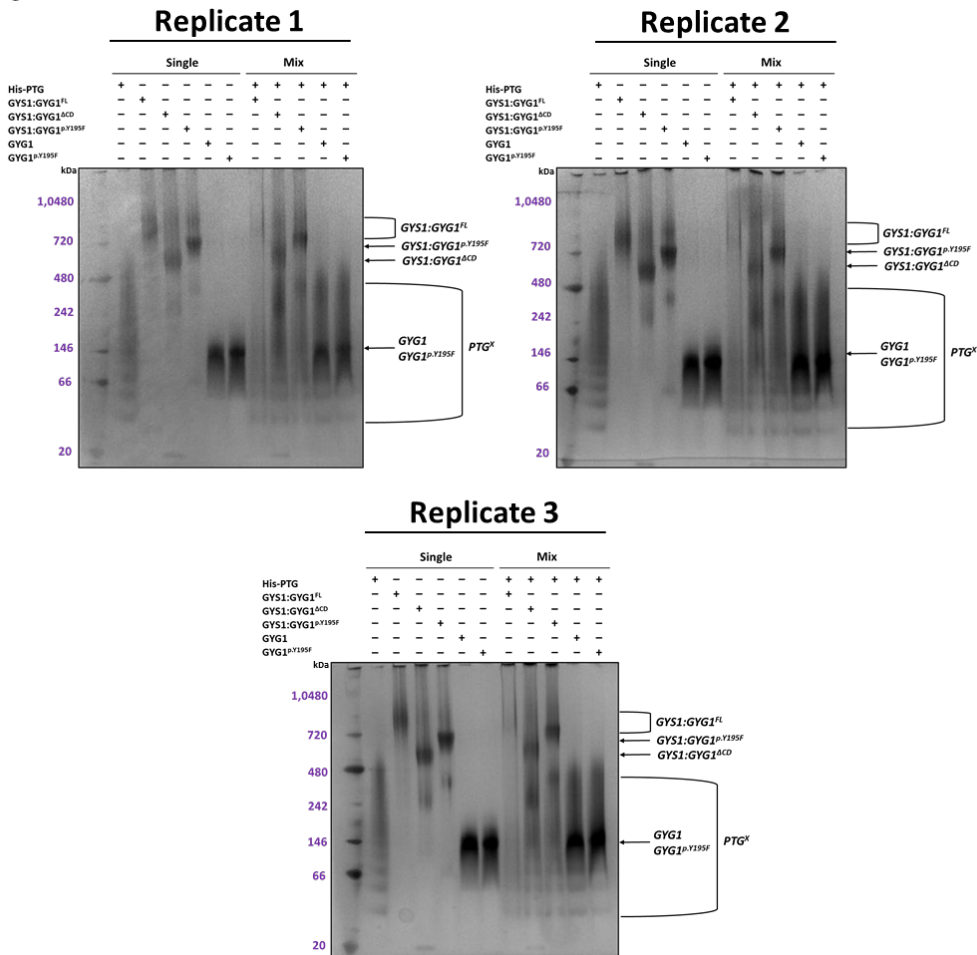

**Supplementary Fig. 3 | PTG pulldowns and BN-PAGE replicates. a**, Coomassie stained SDS-PAGE replicates of PTG(CBM21) pulldowns against GYS1:GYG1<sup>FL</sup>, GYS1:GYG1<sup>p.Y195F</sup>, or GYS1:GYG1<sup>ΔCD</sup>. **b**, Coomassie stained SDS-PAGE replicates of PTG(CBM21) pulldowns against GYG1<sup>FL</sup> or GYG1<sup>p.Y195F</sup>. **c**, Blue native PAGE shift replicates of PTG(CBM21) incubated with GYS1:GYG1<sup>FL</sup>, GYS1:GYG1<sup>p.Y195F</sup>, GYS1:GYG1<sup>ΔCD</sup>, GYG1 alone, or GYG1<sup>p.Y195F</sup> alone. Complex formation between PTG(CBM21) and GYS1:GYG1<sup>FL</sup> was inferred from the disappearance of bands compared to other reaction lanes. CBM21 appears as oligomers but behaves as a monomer with some dimer in solution (data not shown).



**a**

**GYS1:GYG1 $\Delta$ CD WT**  
As-purified Glc6P Titration

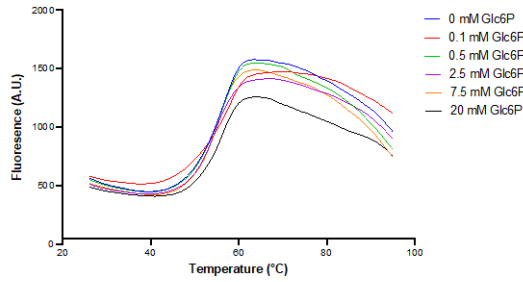**b**

**GYS1:GYG1 $\Delta$ CD WT**  
PP1c Glc6P Titration

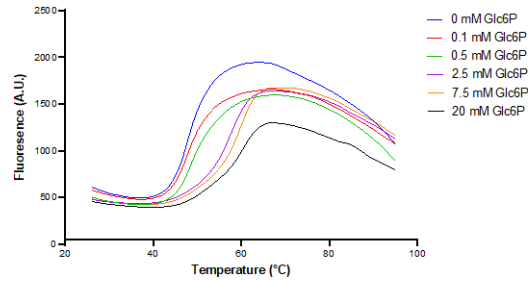**c**

**GYS1<sup>p.R582A+p.R586A</sup>:GYG1 $\Delta$ CD**  
As-purified Glc6P Titration

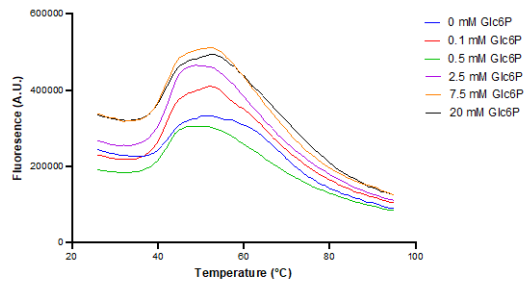**d**

**GYS1<sup>p.R582A+p.R586A</sup>:GYG1 $\Delta$ CD**  
PP1c Glc6P Titration

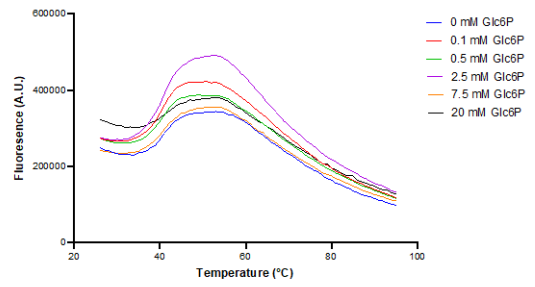**e**

**PTG Sugar Screen**

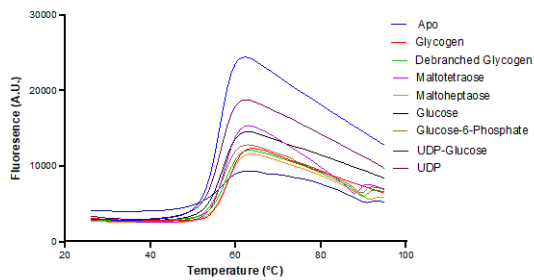**f**

**PTG WT Maltoheptaose Titration**

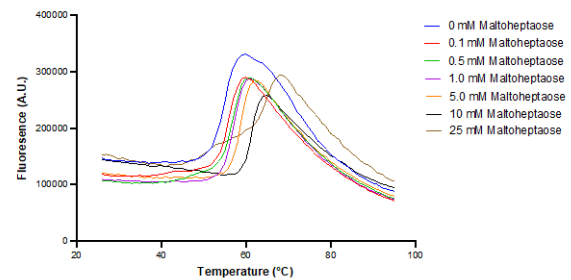**g**

**PTG<sup>p.Y203R</sup> Maltoheptaose Titration**

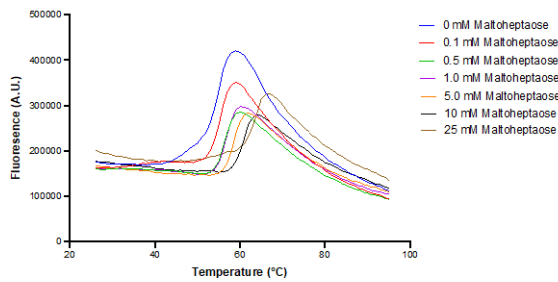**h**

**PTG<sup>p.W246R</sup> Maltoheptaose Titration**

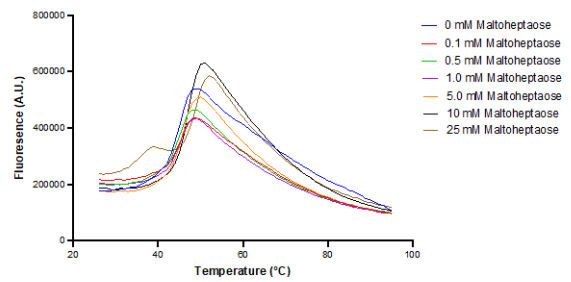

**Supplementary Fig. 4 | Representative thermal shift unfolding curves of each GYS1:GYG1 complex and PTG(CBM21) mutant. a,** GYS1:GYG1<sup>ΔCD</sup> WT as-purified, titrated with increasing Glc6P. **b,** GYS1:GYG1<sup>ΔCD</sup> WT + PP1c, titrated with increasing Glc6P. **c,** GYS1<sup>p.R582A+p.R586A</sup>:GYG1<sup>ΔCD</sup> as-purified, titrated with increasing Glc6P. **d,** GYS1<sup>p.R582A+p.R586A</sup>:GYG1<sup>ΔCD</sup> + PP1c, titrated with increasing Glc6P. **e,** PTG(CBM21) screened against various sugars and ligands at 1 mM each. **f,** PTG(CBM21) WT, titrated with increasing maltoheptaose. **g,** PTG(CBM21)<sup>p.Y203R</sup>, titrated with increasing maltoheptaose. **h,** PTG(CBM21)<sup>p.W246R</sup>, titrated with increasing maltoheptaose.

**Supplementary Table 1 | Oligonucleotide sequences used for mutagenesis**

| Primer              | Sequence                            |
|---------------------|-------------------------------------|
| GYS1_R582A+R586A_Fr | GGCCATCATCCAGGCCAACCGCACGGAGCGCCTC  |
| GYS1_R582A+R586A_Rv | GCCTGGATGATGGCCTGCCGCCGGCTCTGCTG    |
| PTG_W246R_Fr        | AGTCTTTCGGGACAACAATGATGGTCAGAATT    |
| PTG_W246R_Rv        | TTGTCCCGAAAGACTTGCCCATTAGCA         |
| PTG_Y203R_Fr        | CTGTGTCCGTATGAAAAATGTGTATGGTGGCACAG |
| PTG_Y203R_Rv        | TTCATACGGACACAGTCTACGTCAGTGTAG      |

Uncropped image of Supplementary Fig. 3a

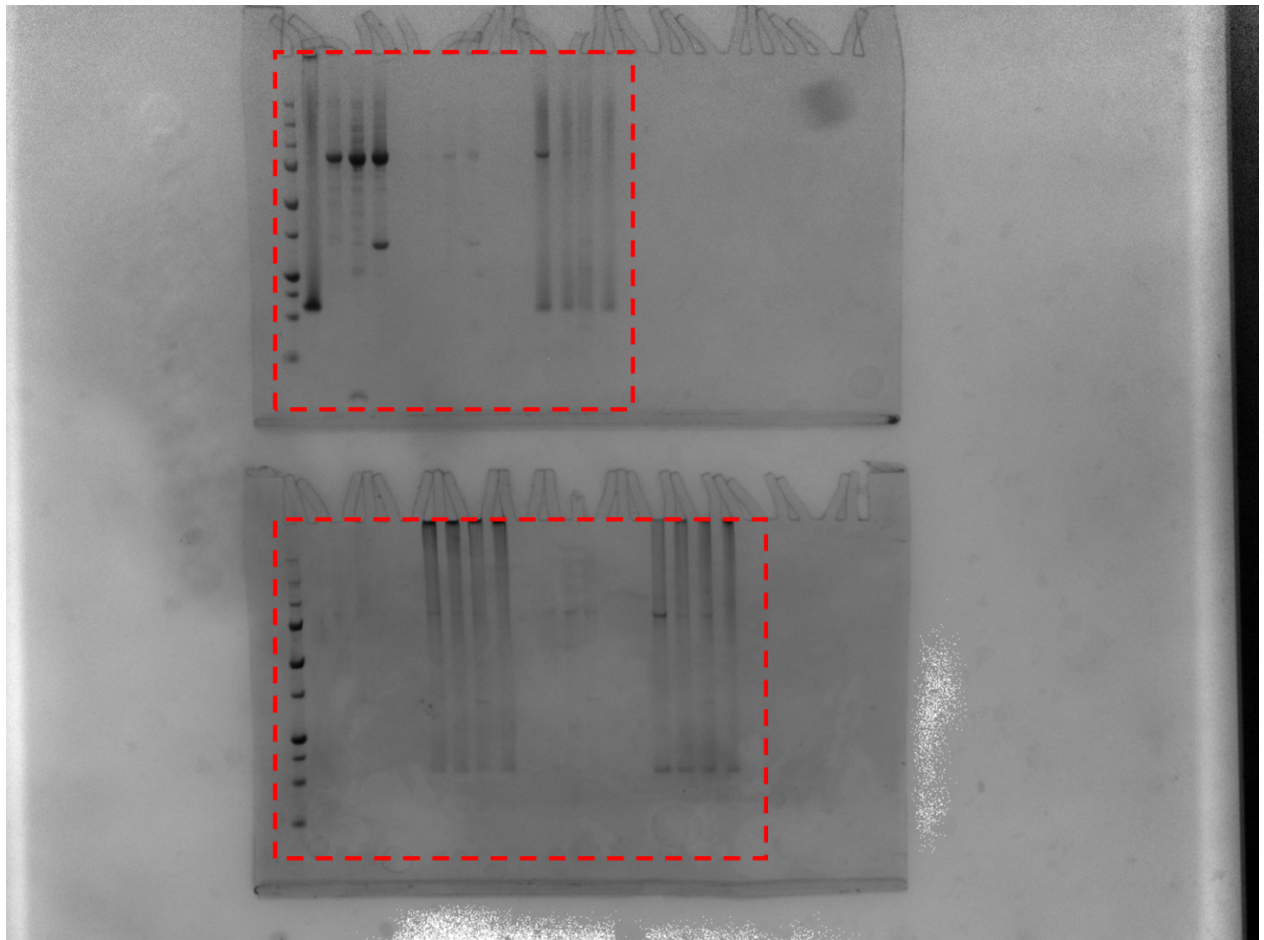

Uncropped image of Supplementary Fig. 3b

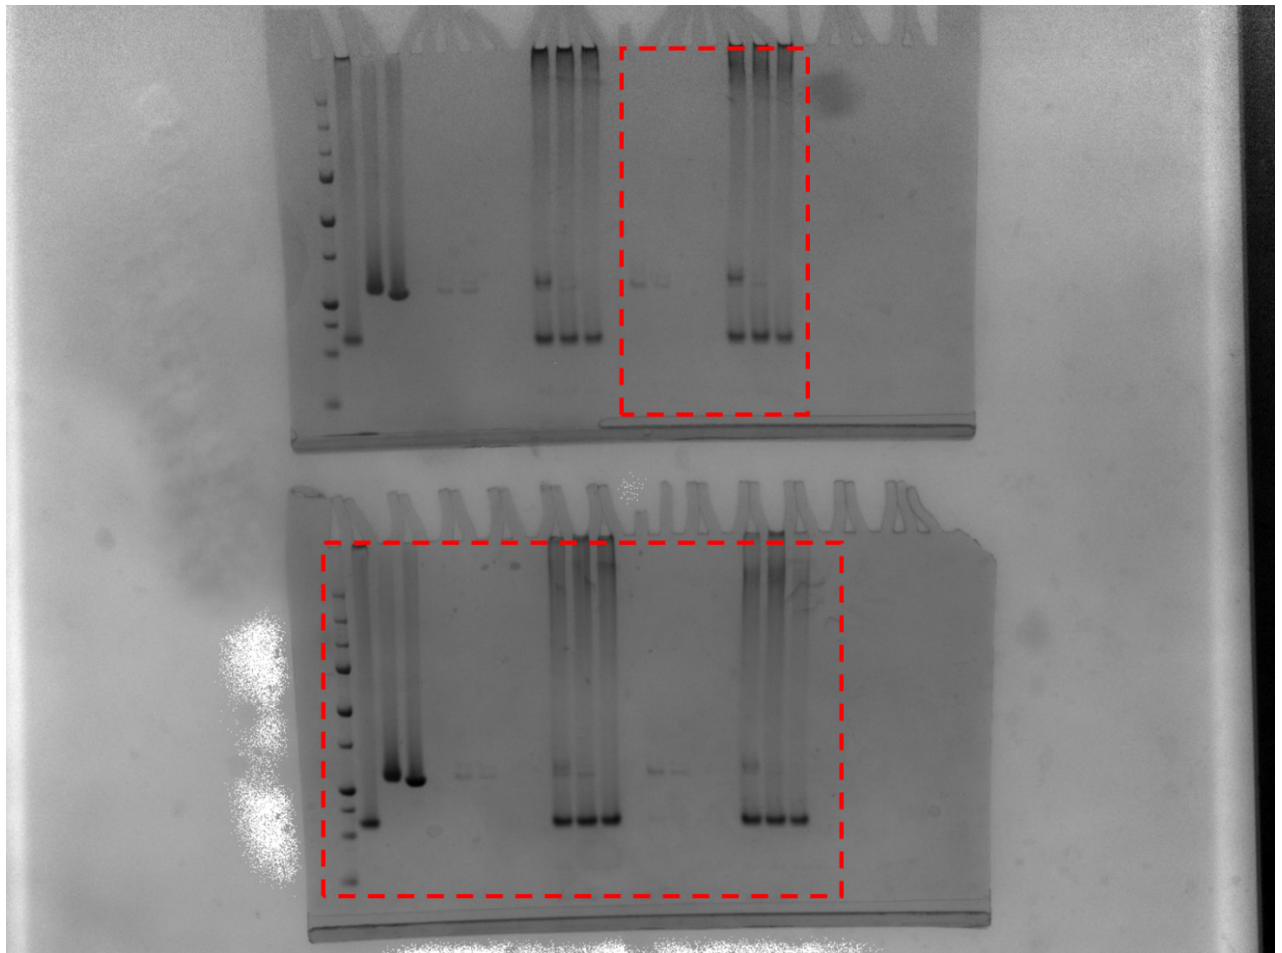

Uncropped image of Supplementary Fig. 3c

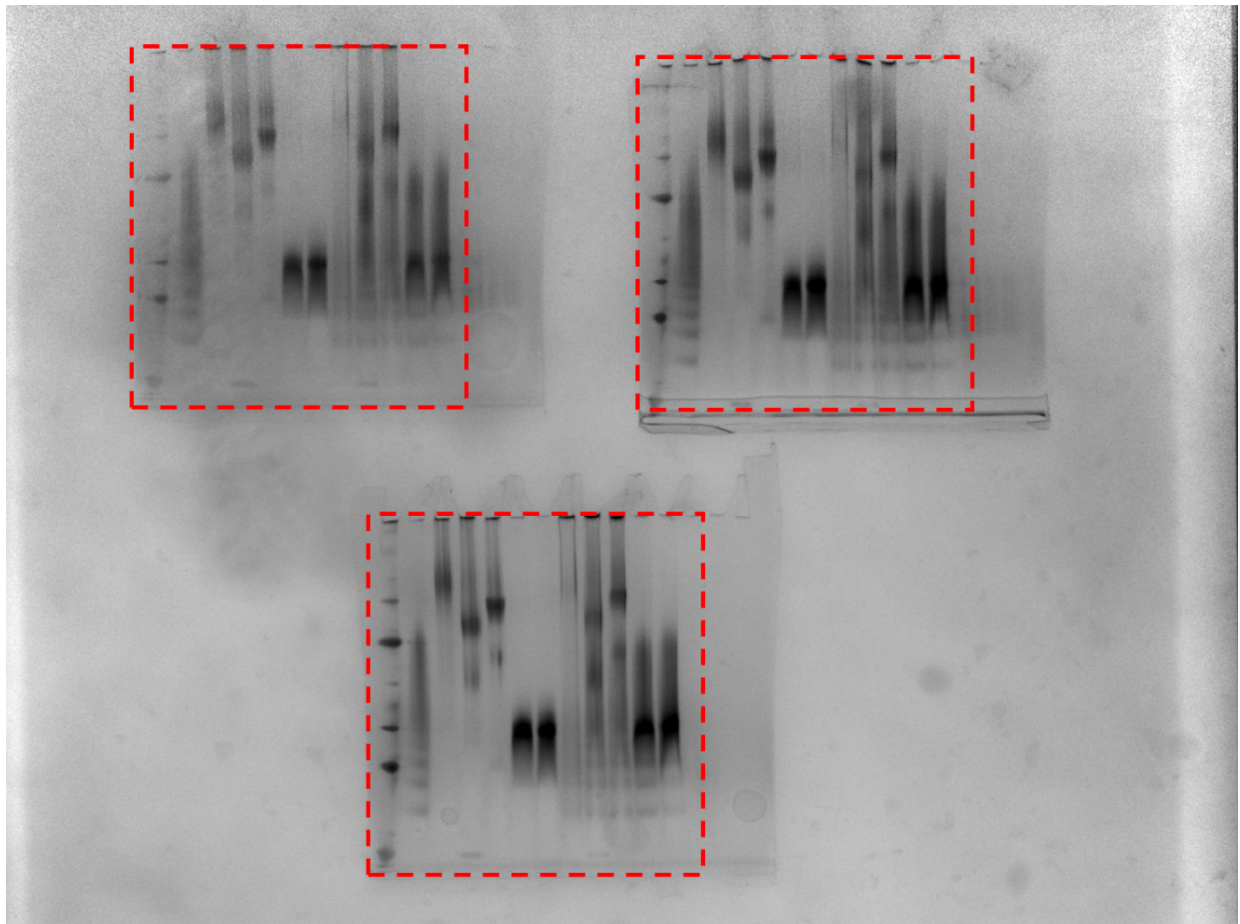

Supplement: 41594_2022_799_MOESM1_ESM.pdf [file 41594_2022_799_MOESM1_ESM.pdf]
