# Supplementary material for: Molecular basis for the regulation of human glycogen synthase by phosphorylation and glucose-6-phosphate
Source: PubMed Central journal article supplement (PMC9287172; doi:10.1038/s41594-022-00799-3), 2022-07-14

Uncropped image of Fig. 6b

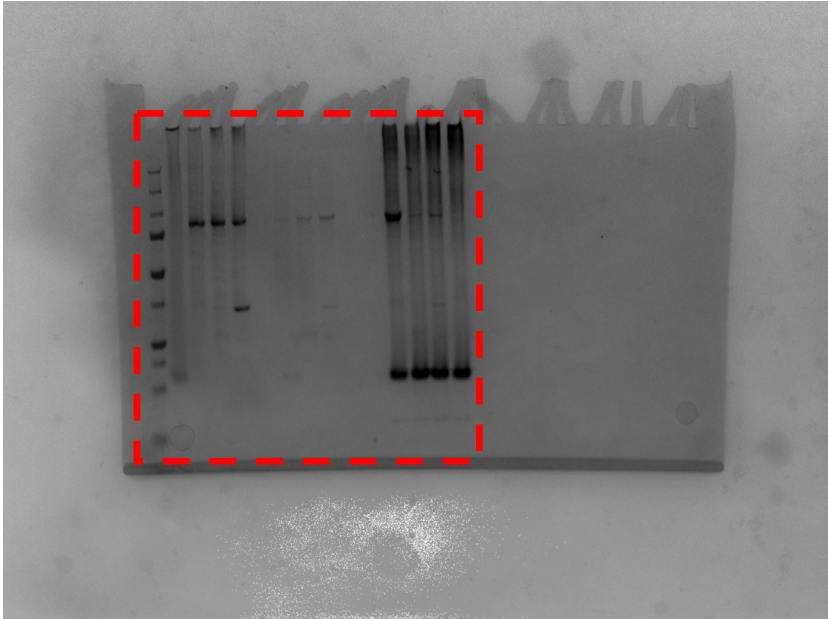

Uncropped image of Fig. 6C

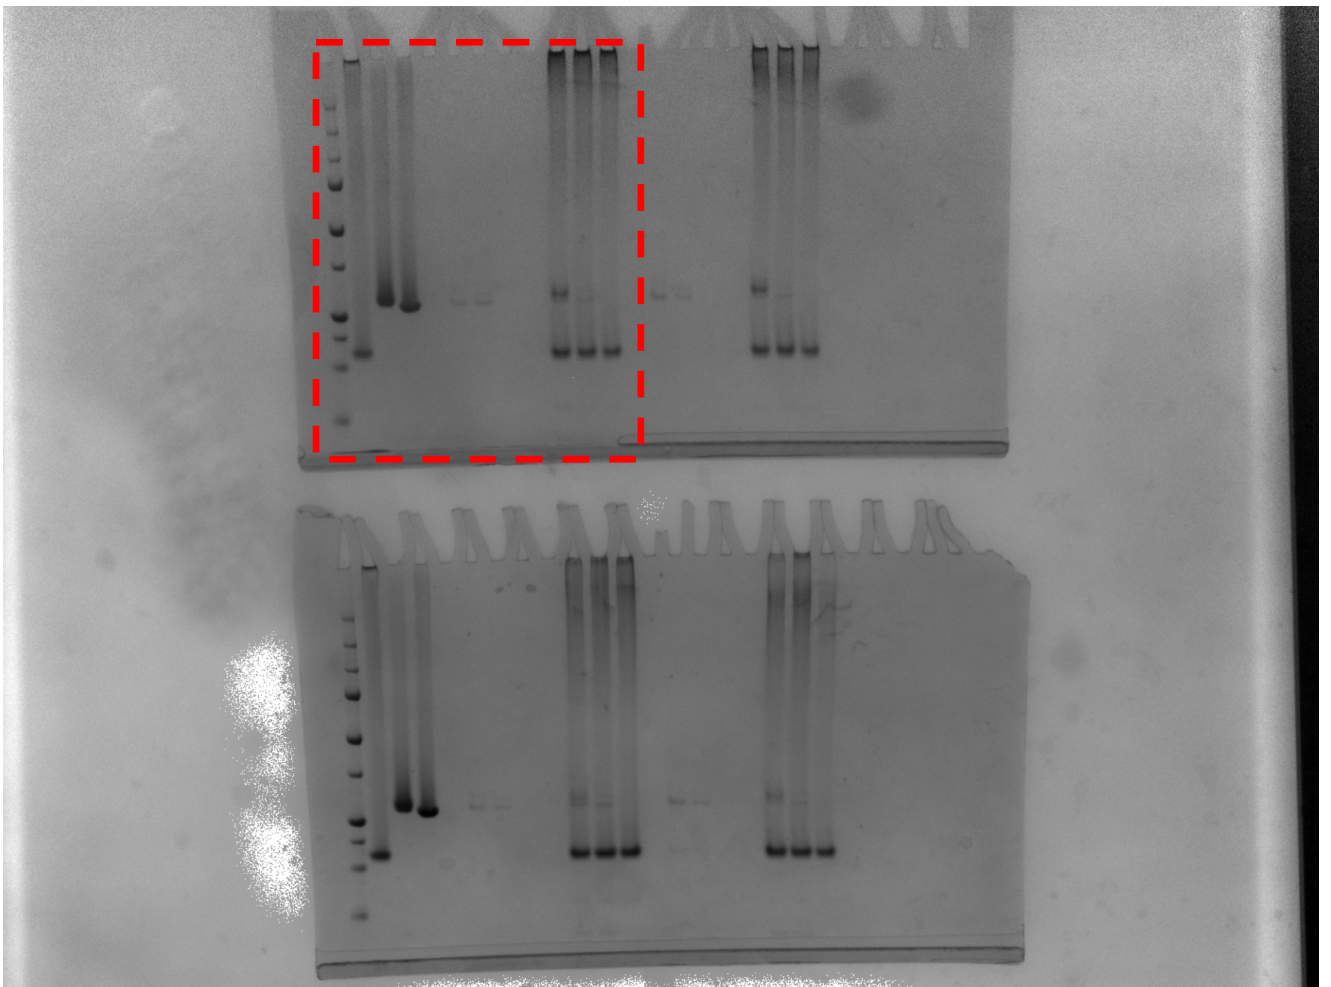

Supplement: 41594_2022_799_MOESM10_ESM.pdf [file 41594_2022_799_MOESM10_ESM.pdf]
